# Supplementary material
Source: HighWire-hosted journal article supplement (https://bmjopen.bmj.com/content/10/3/e034299)

**A** Improvements in five-year mortality following admission

Change in lnHR from one decade to the next (2001–2011)

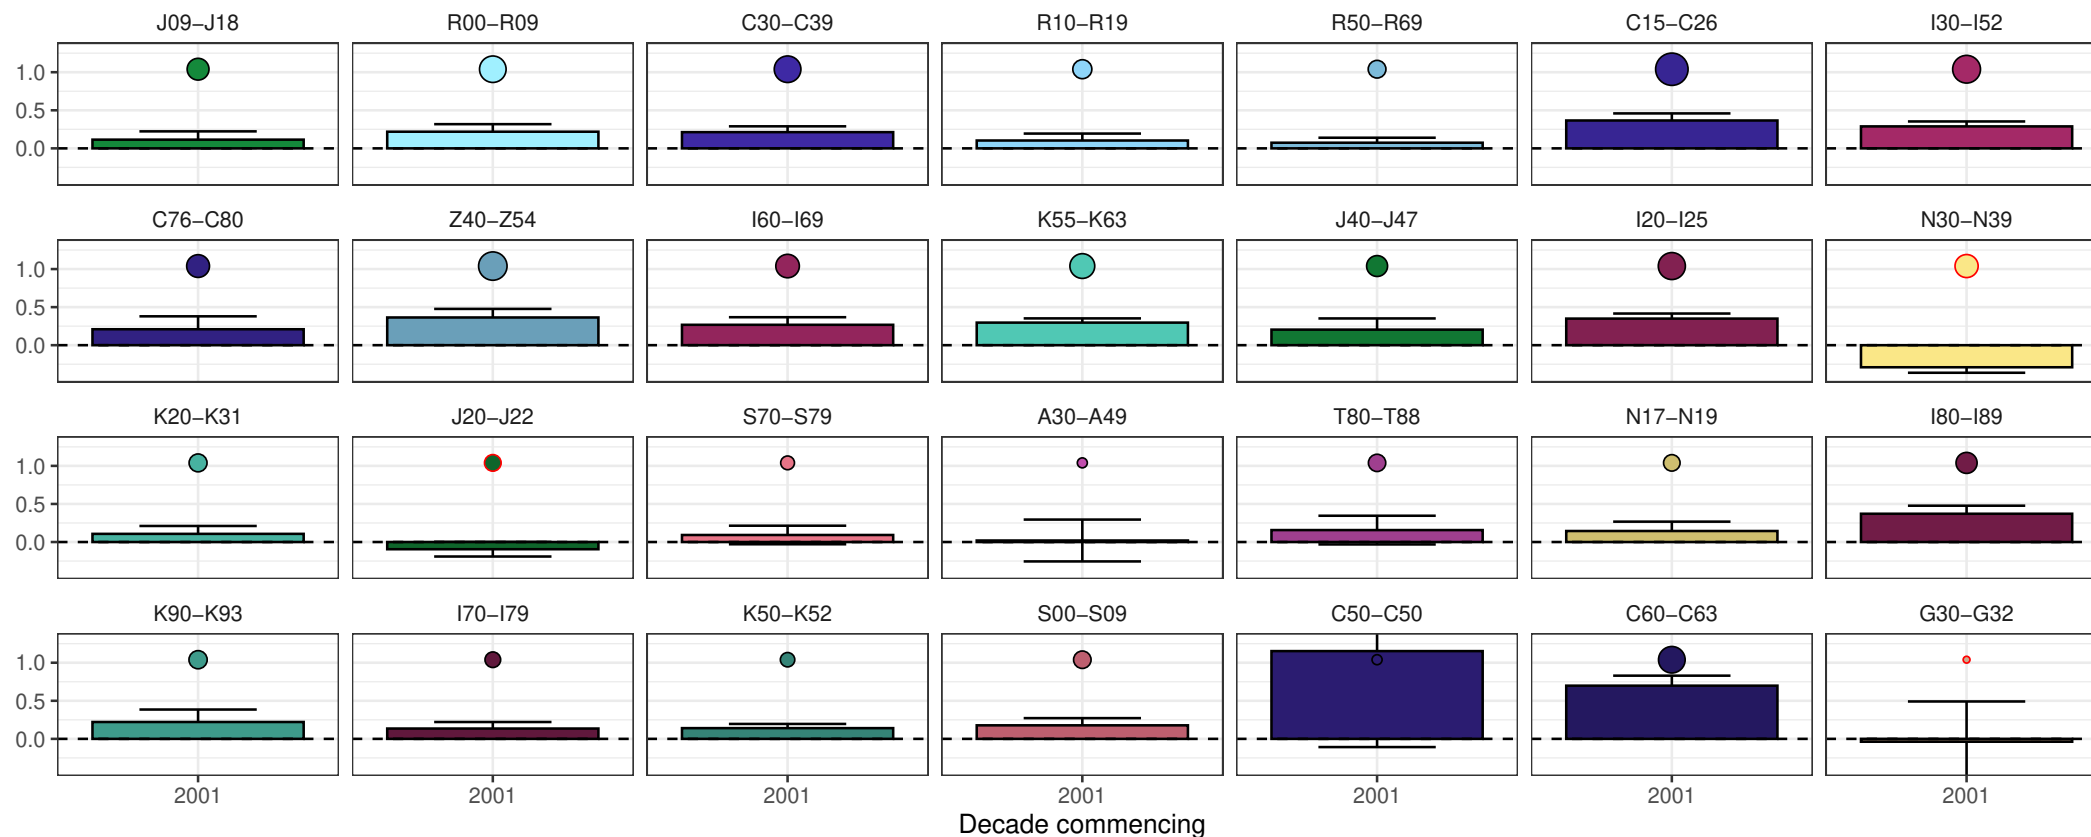

**B** Combined improvements in five-year mortality following admission

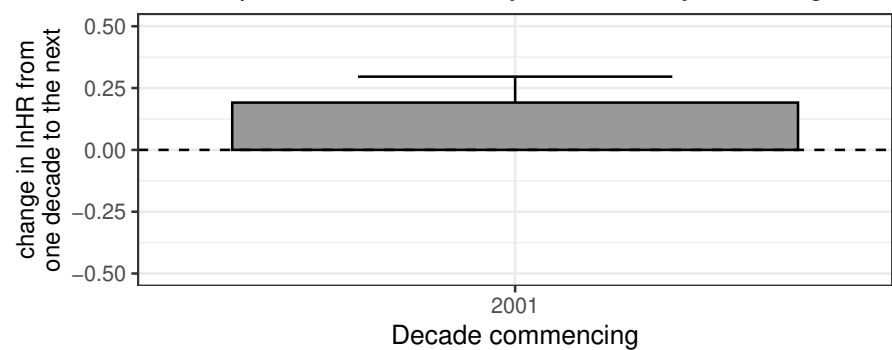

**C** Observed improvements in mortality

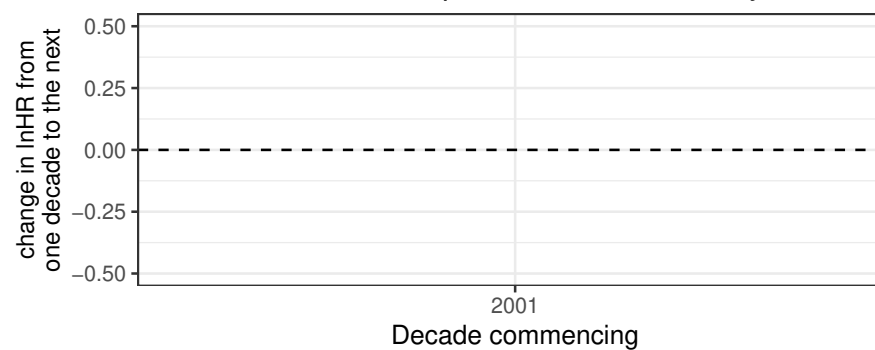

**A** Improvements in five-year mortality following admission

Change in lnHR from one decade to the next (2001–2011)

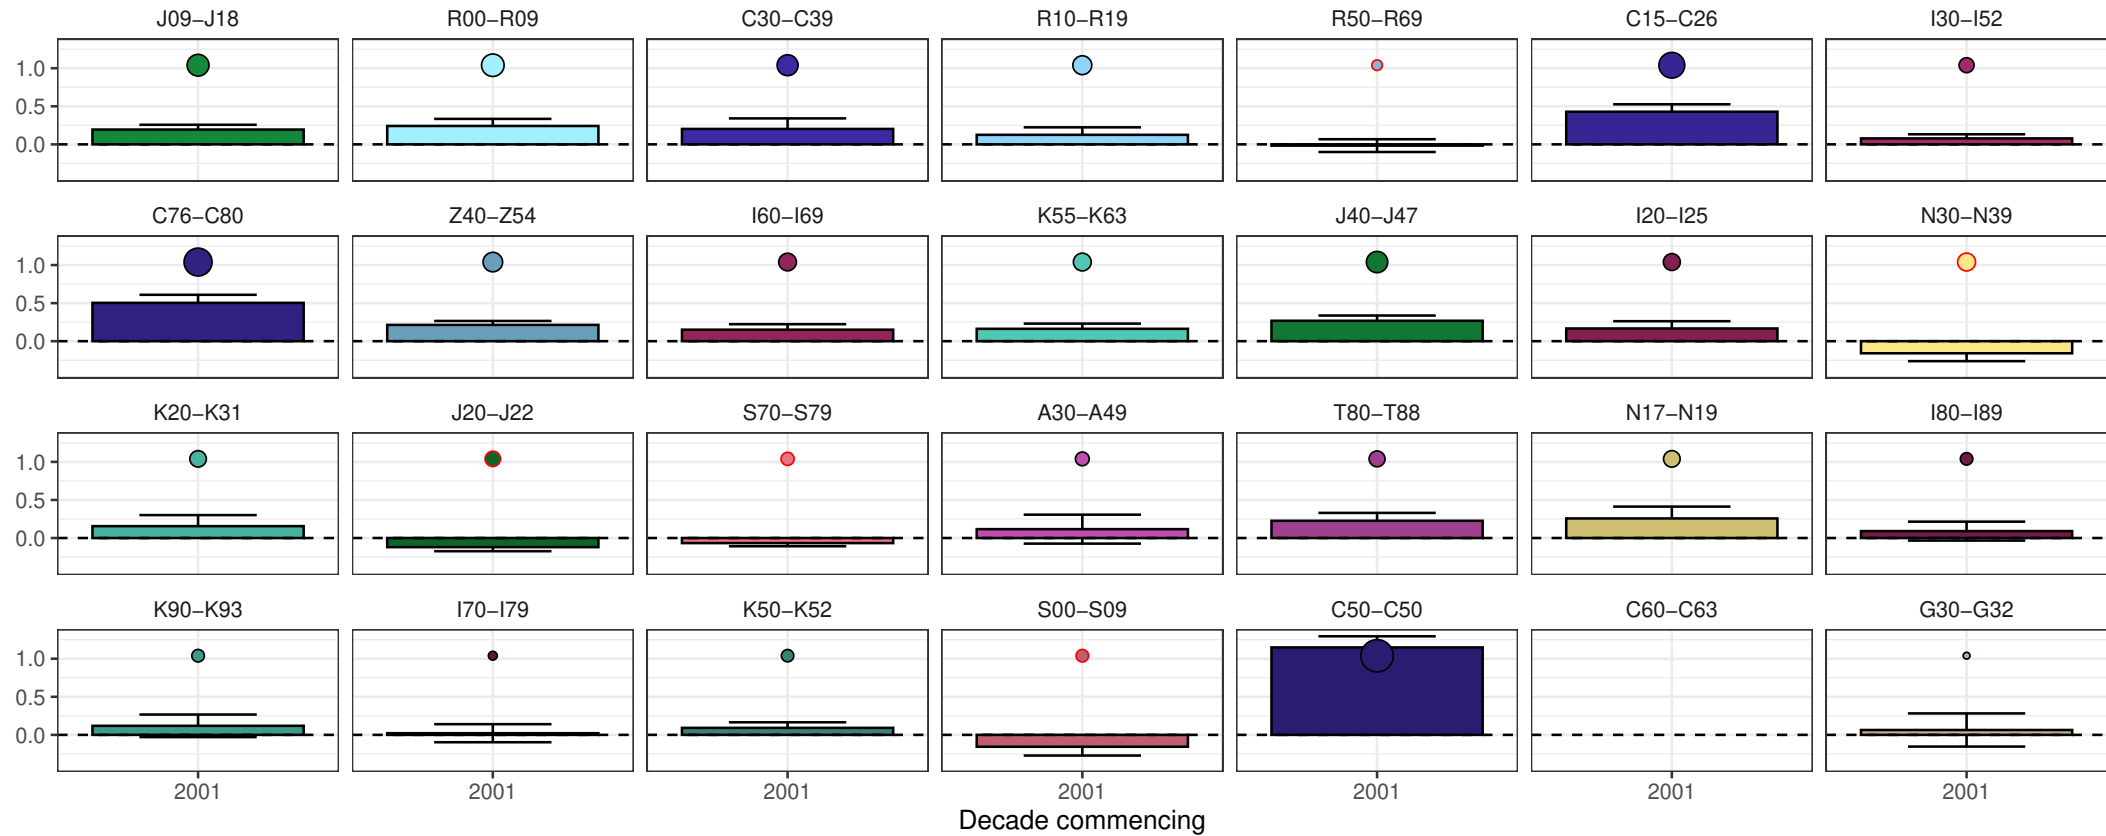

**B** Combined improvements in five-year mortality following admission

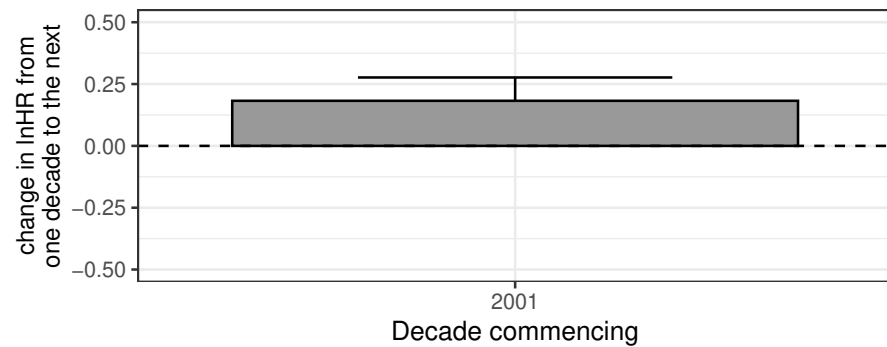

**C**

Observed improvements in mortality

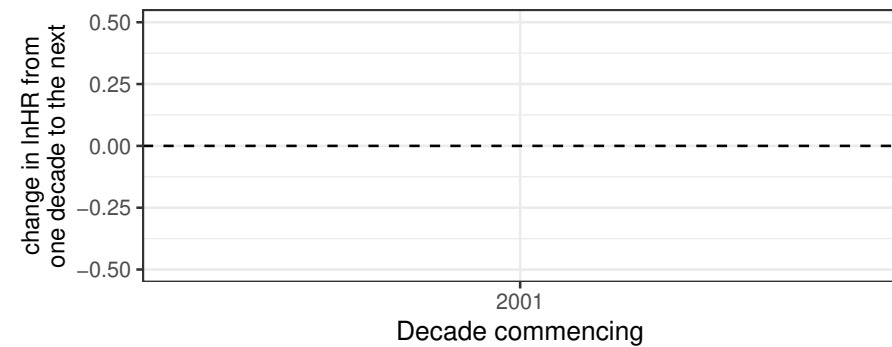

**A** Improvements in five-year mortality following admission

Change in lnHR from one decade to the next (2001–2011)

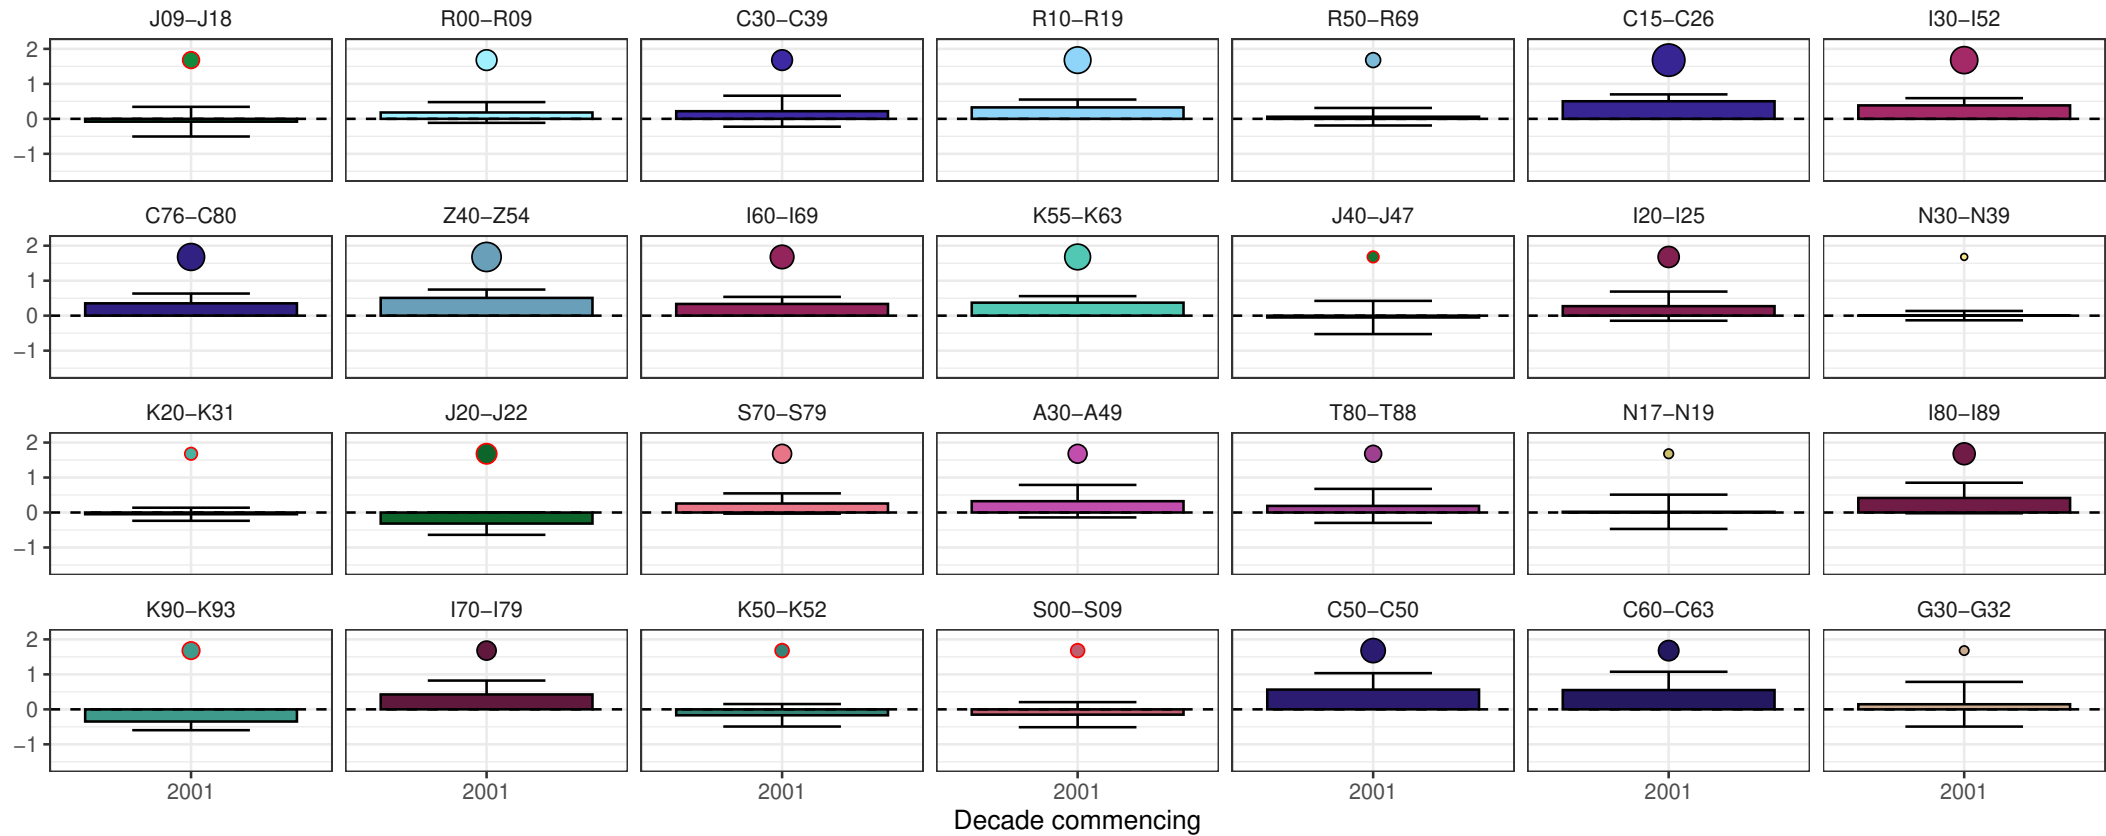

**B** Combined improvements in five-year mortality following admission

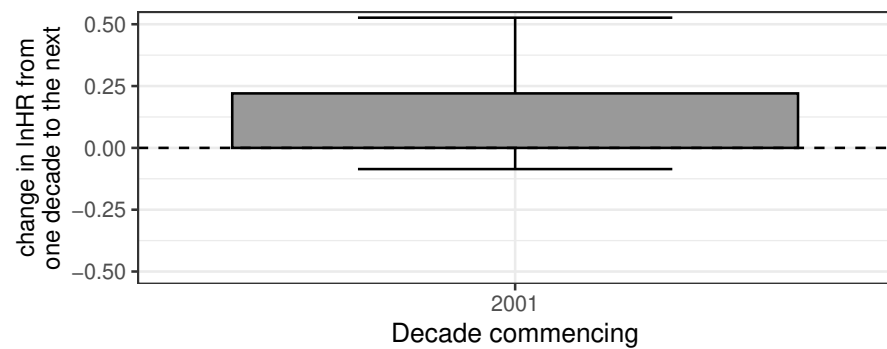

**C**

Observed improvements in mortality

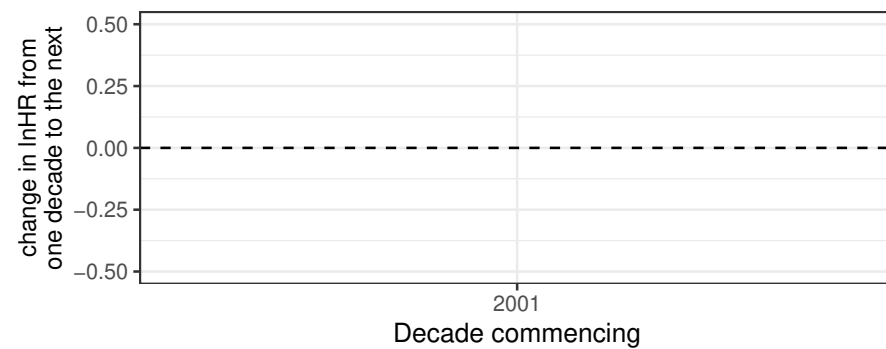

**A** Improvements in five-year mortality following admission

Change in lnHR from one decade to the next (2001–2011)

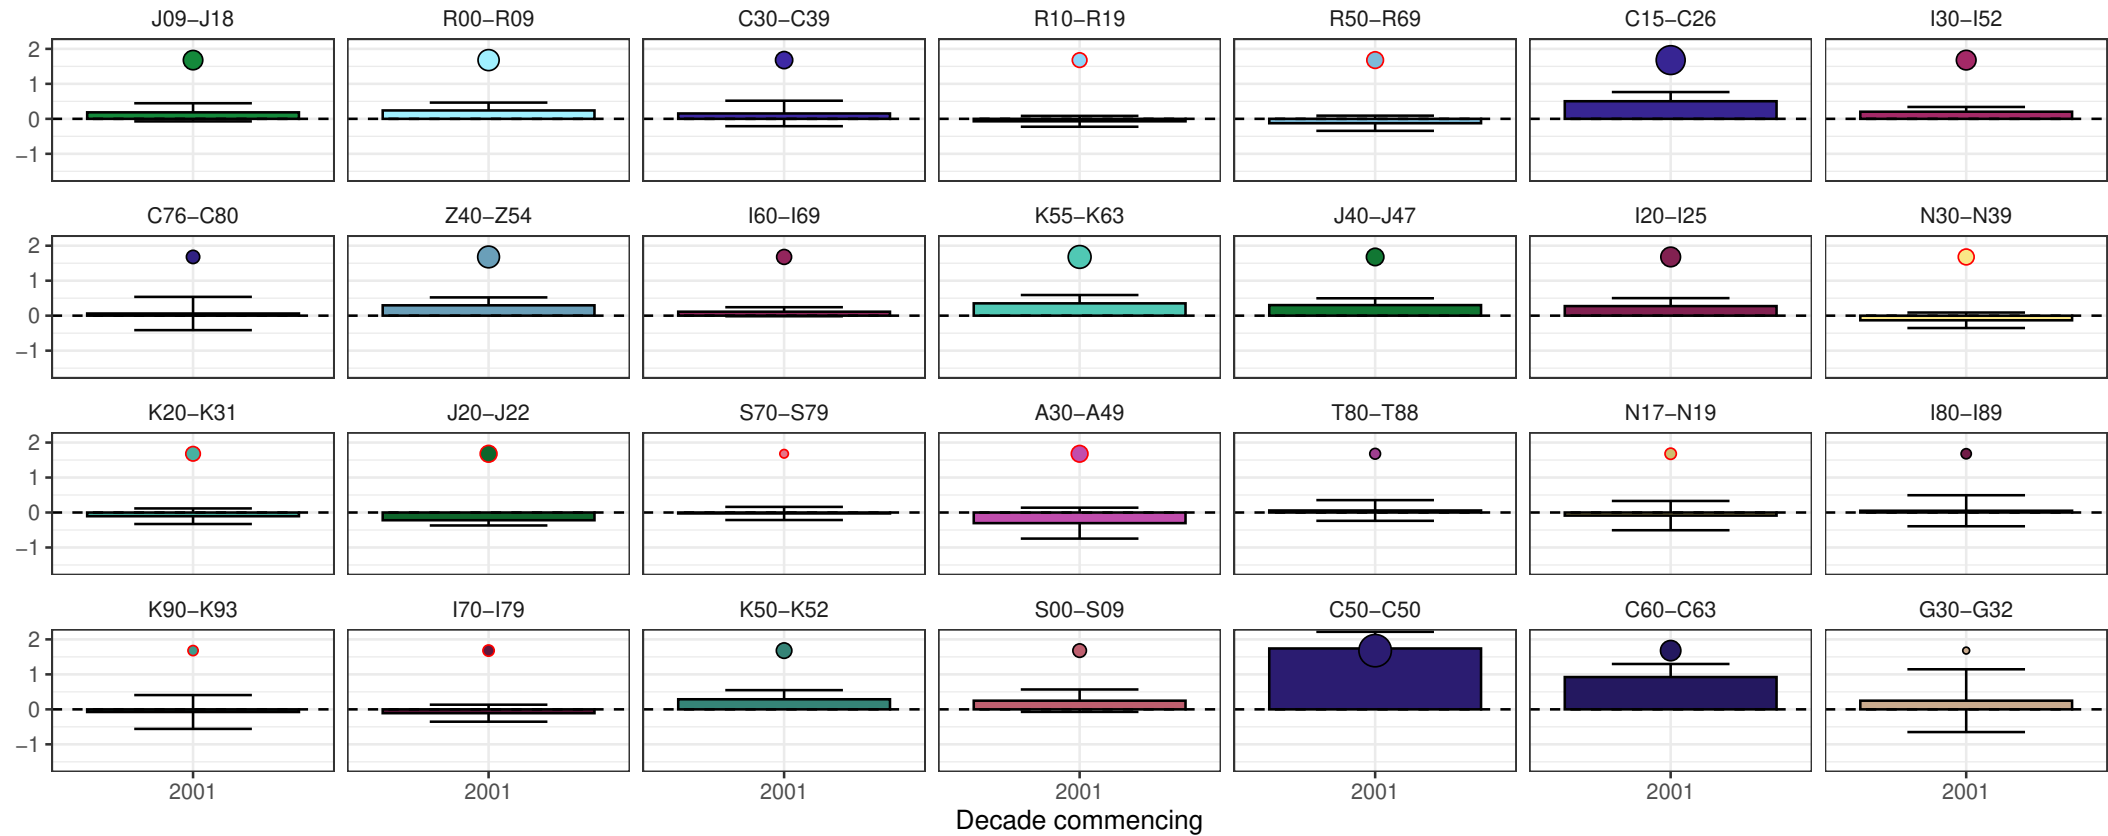

**B** Combined improvements in five-year mortality following admission

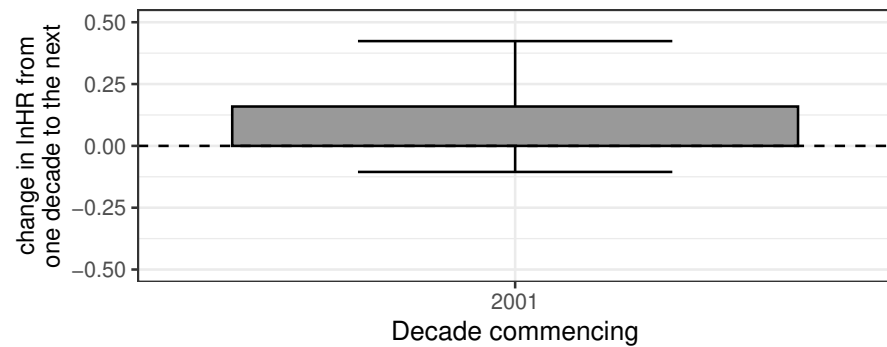

**C**

Observed improvements in mortality

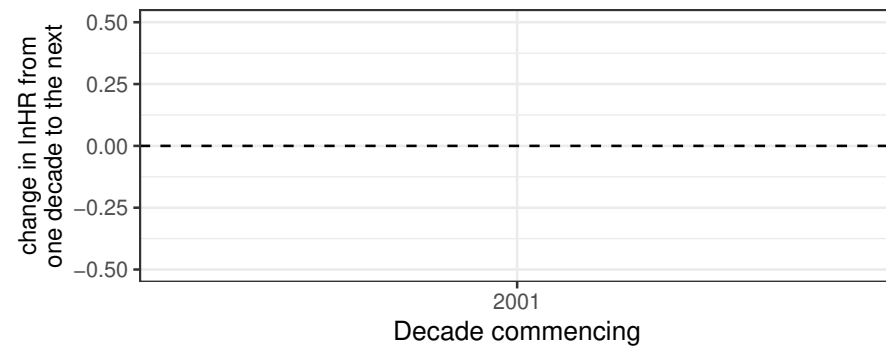

**A** Improvements in five-year mortality following admission

Change in lnHR from one decade to the next (2001–2011)

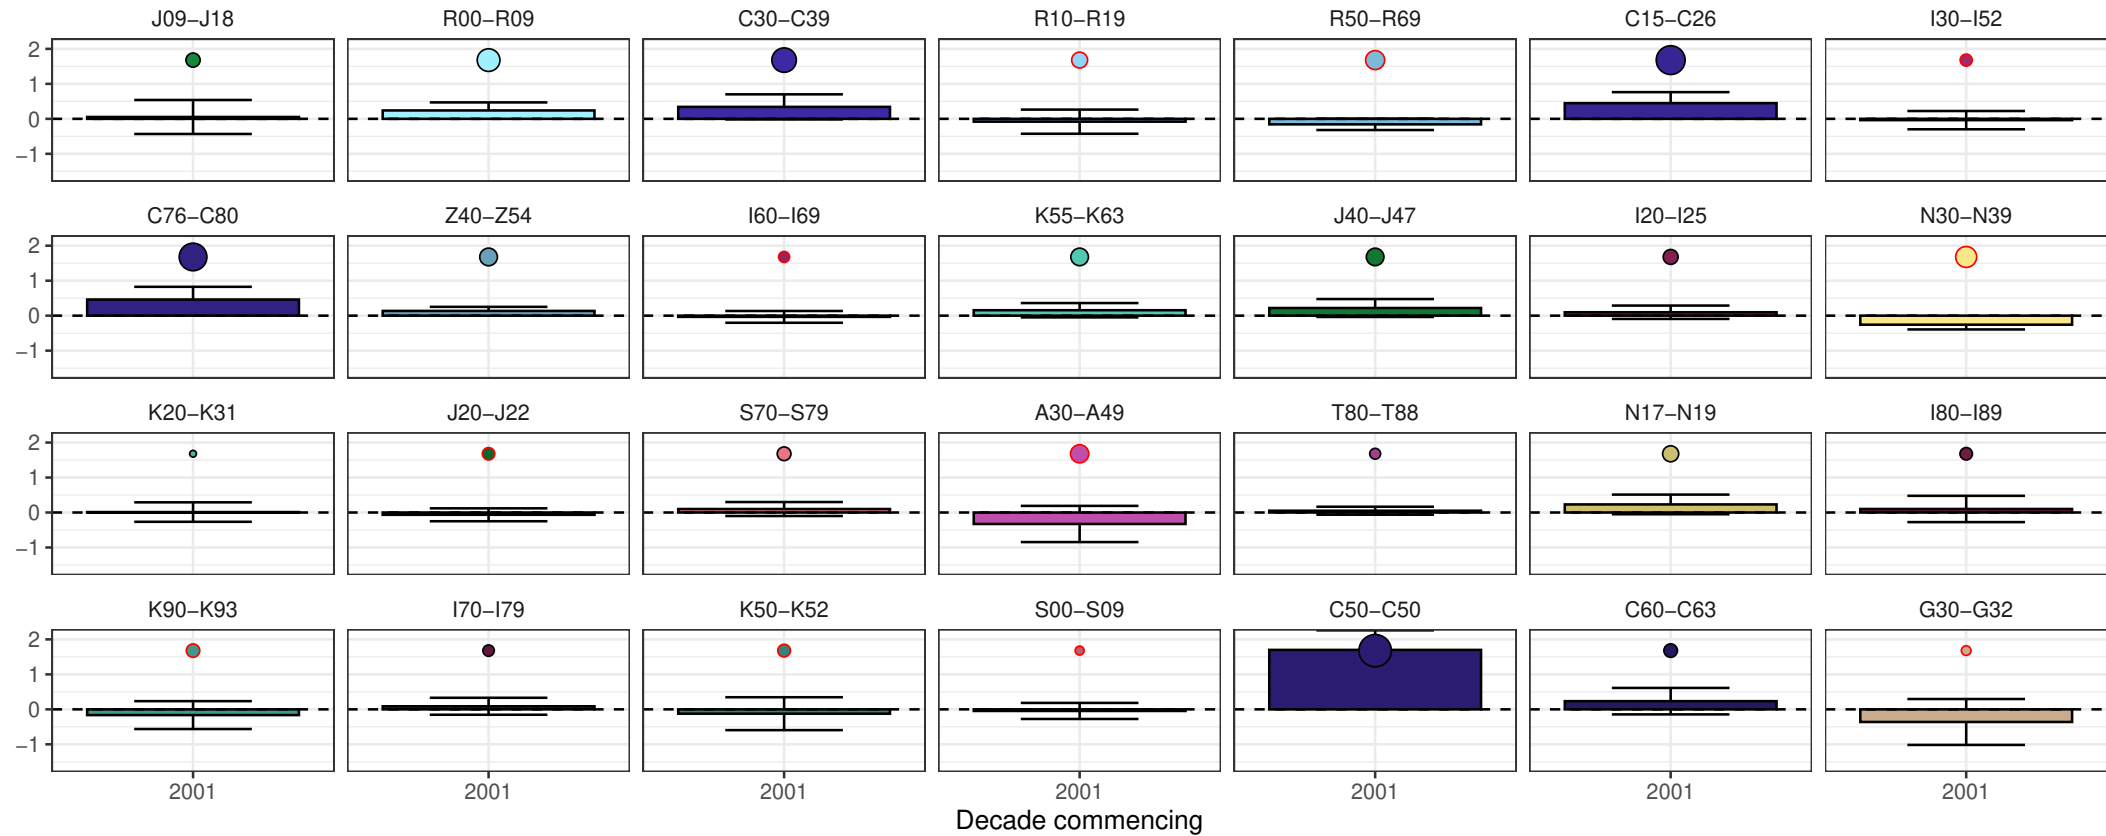

**B** Combined improvements in five-year mortality following admission

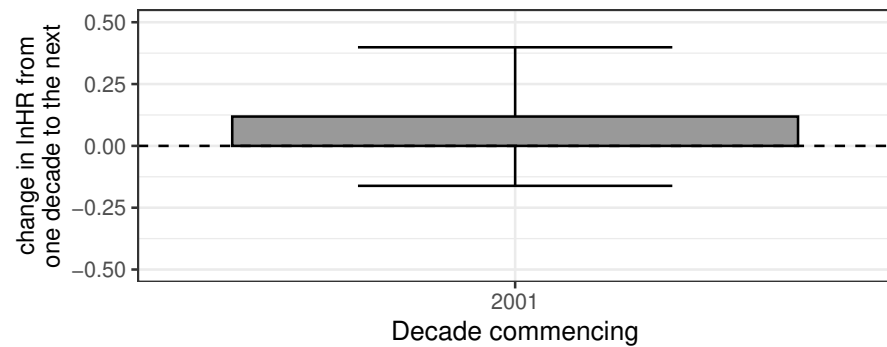

**C**

Observed improvements in mortality



**A** Improvements in five-year mortality following admission

Change in lnHR from one decade to the next (2001–2011)

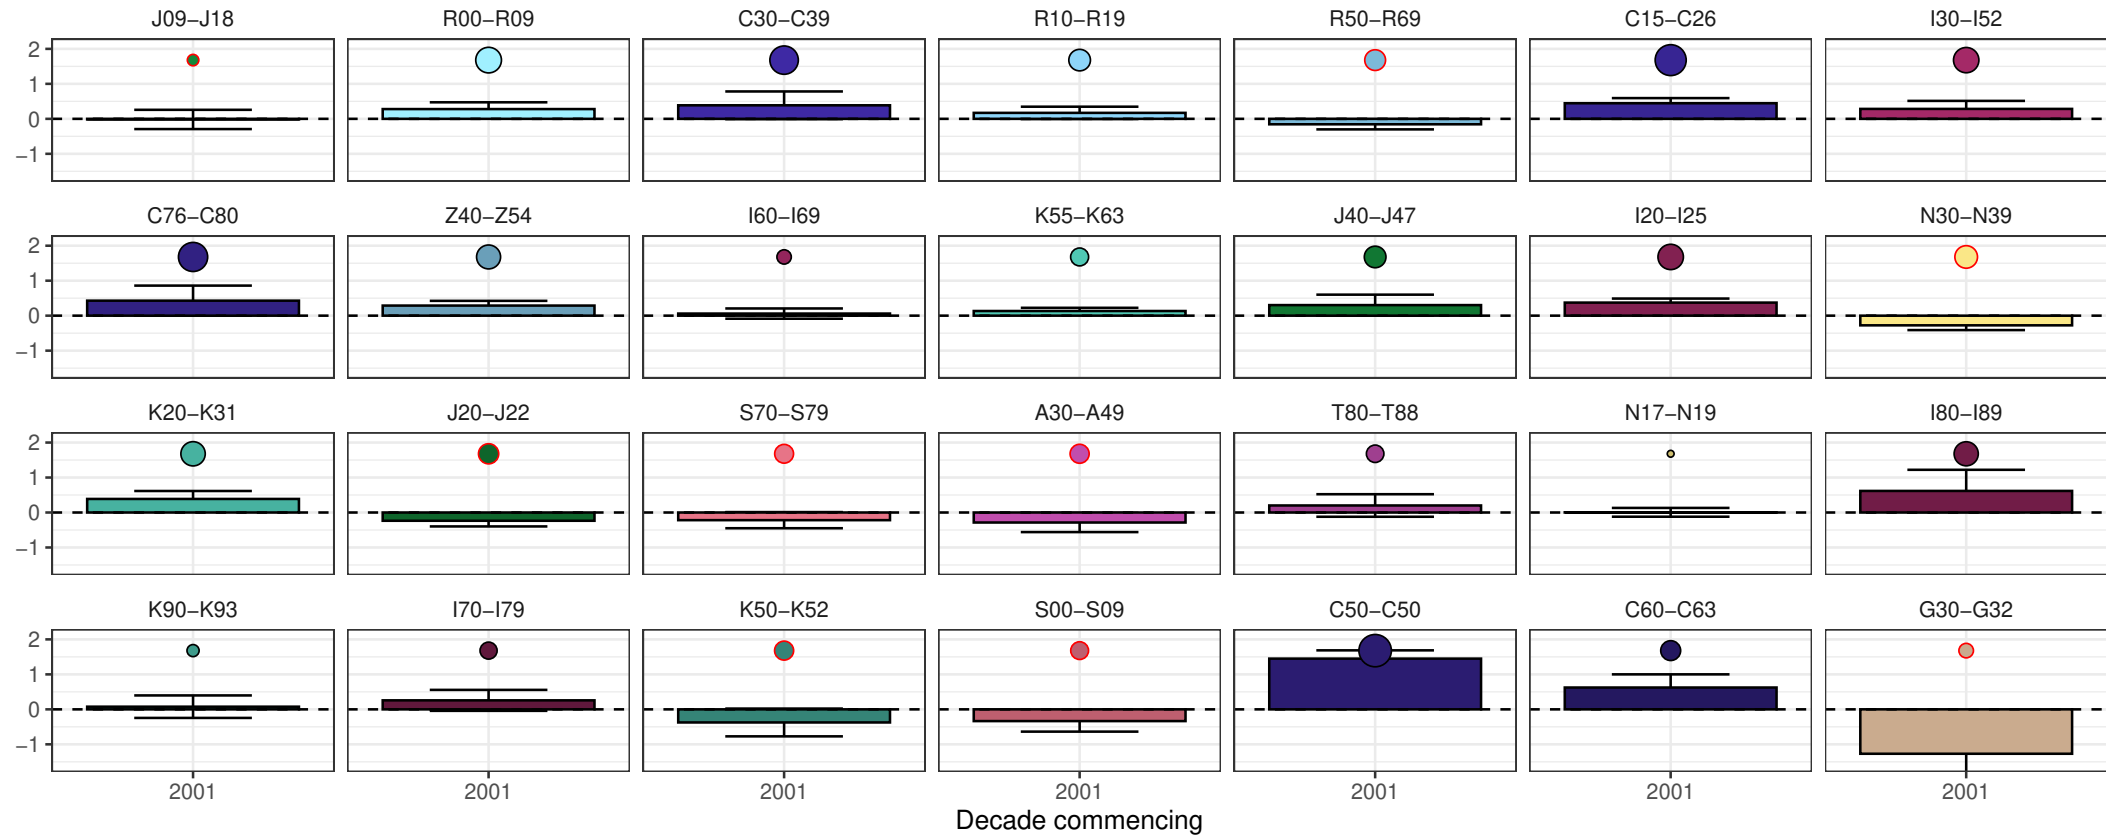

**B** Combined improvements in five-year mortality following admission

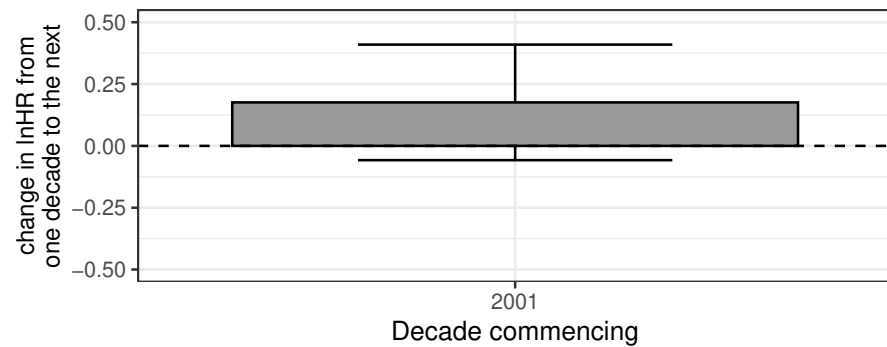

**C**

Observed improvements in mortality

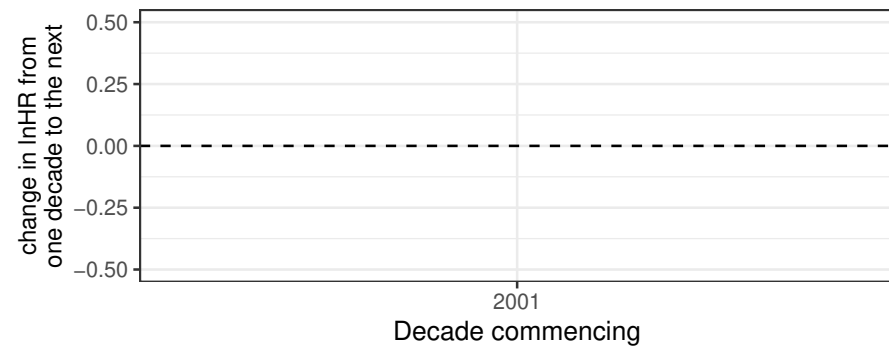

**A** Improvements in five-year mortality following admission

Change in lnHR from one decade to the next (2001–2011)

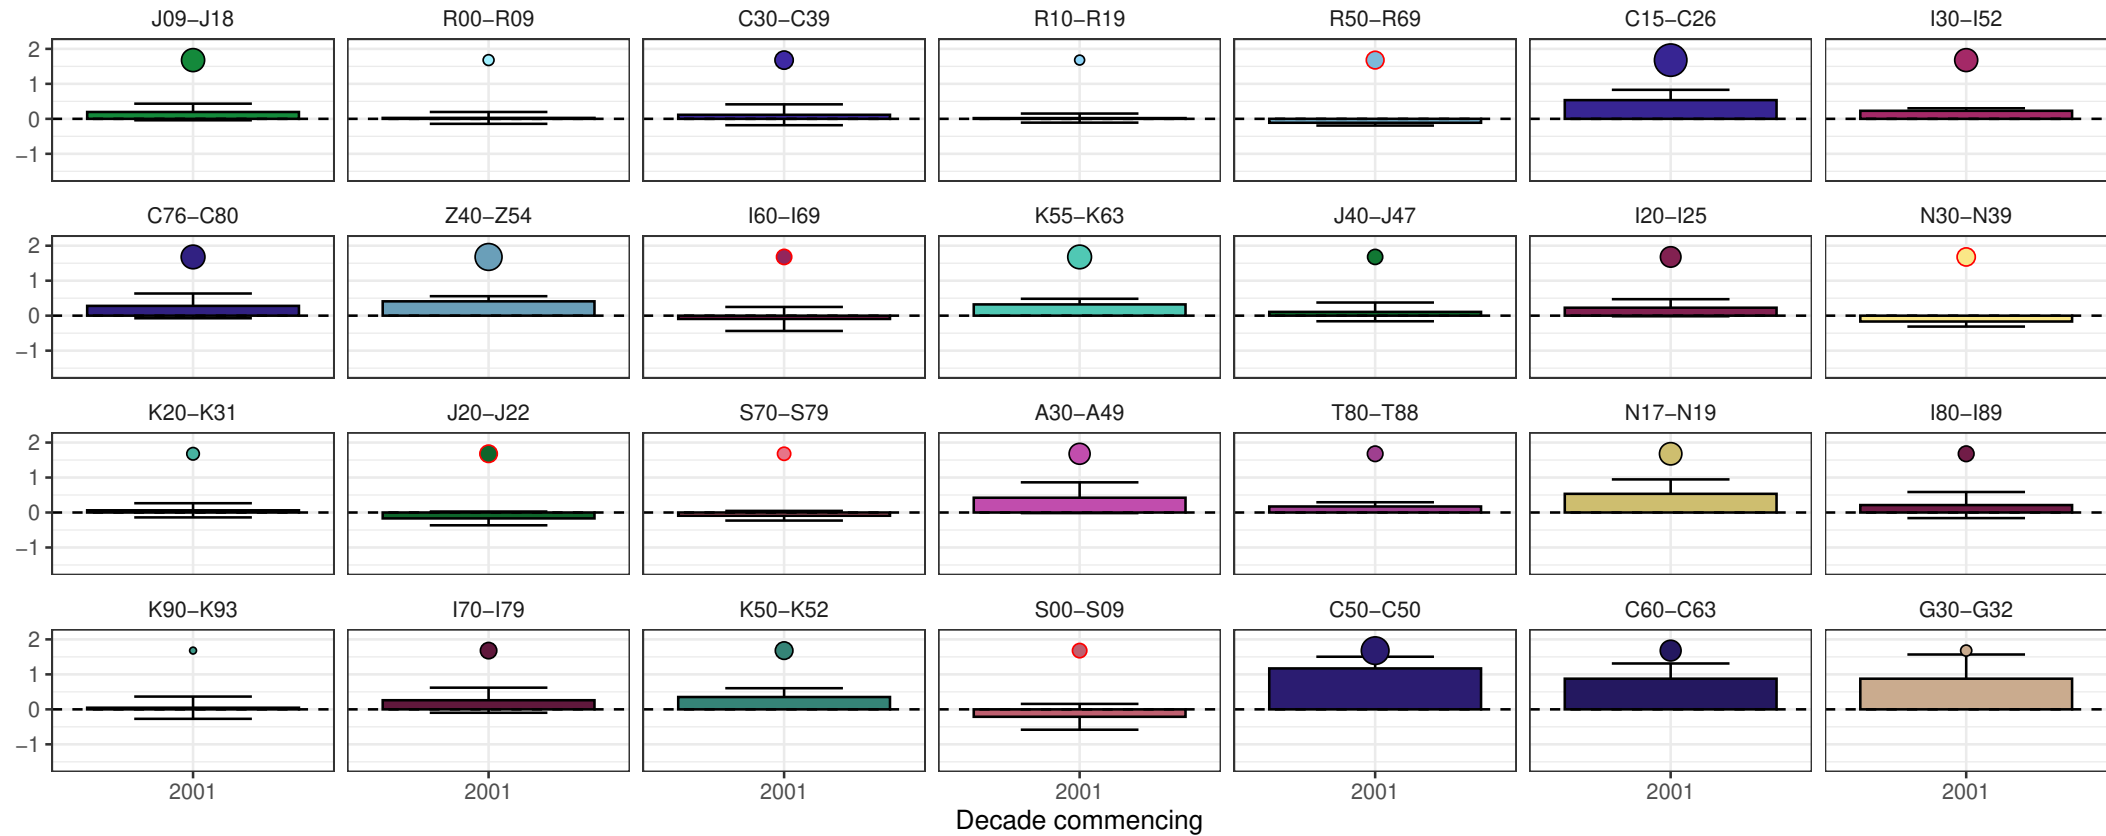

**B** Combined improvements in five-year mortality following admission

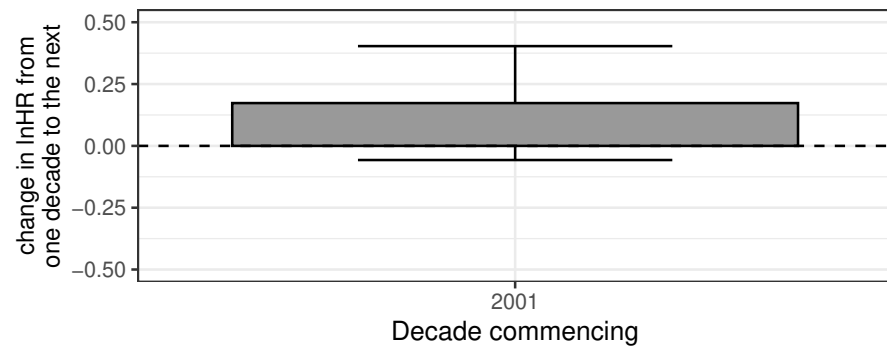

**C**

Observed improvements in mortality



**A** Improvements in five-year mortality following admission

Change in lnHR from one decade to the next (2001–2011)

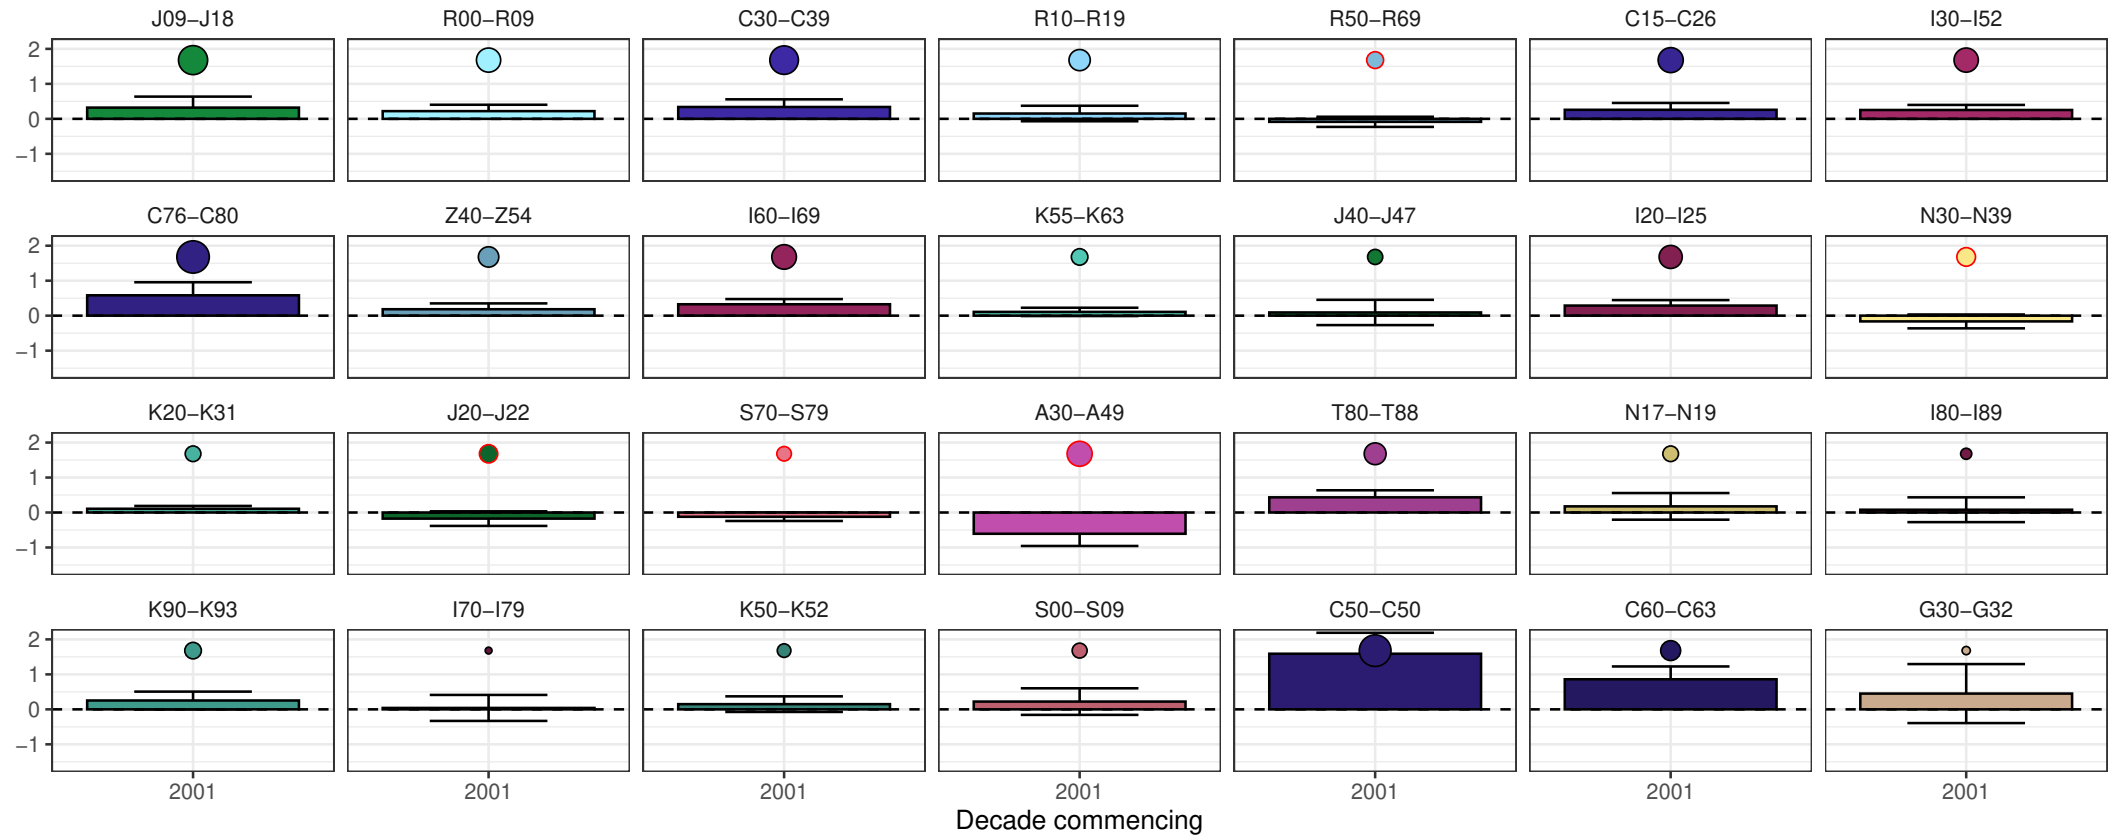

**B** Combined improvements in five-year mortality following admission

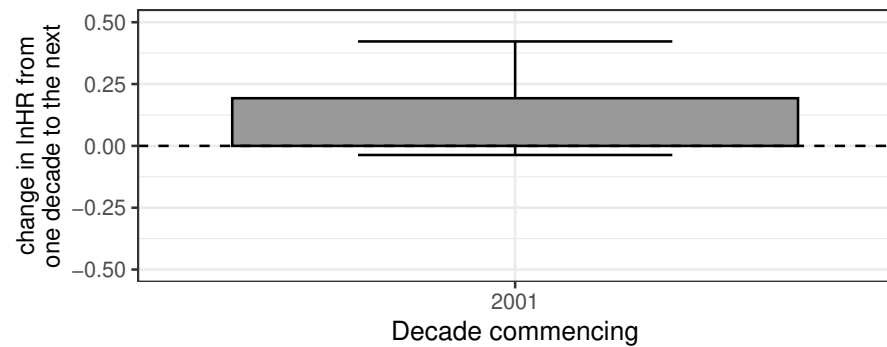

**C** Observed improvements in mortality





**A** Improvements in five-year mortality following admission

Change in lnHR from one decade to the next (2001–2011)

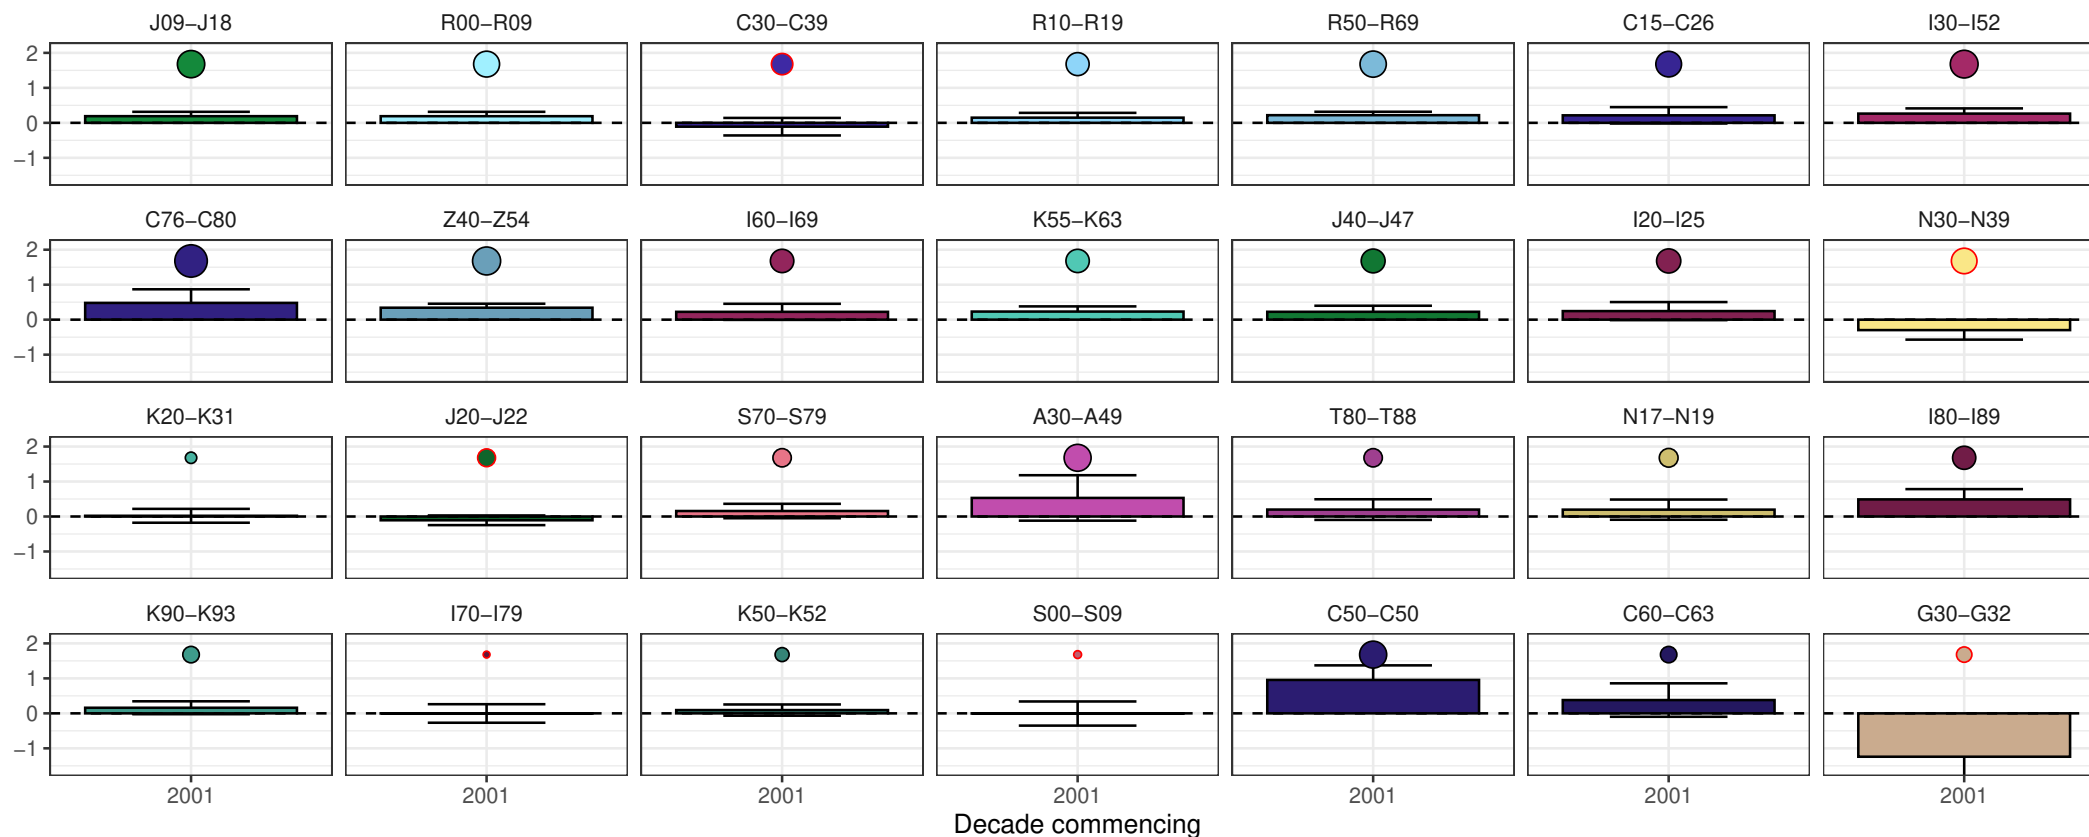

**B** Combined improvements in five-year mortality following admission

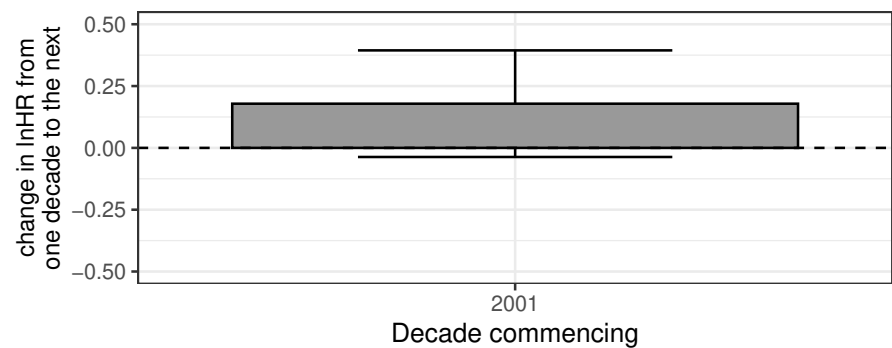

**C**

Observed improvements in mortality

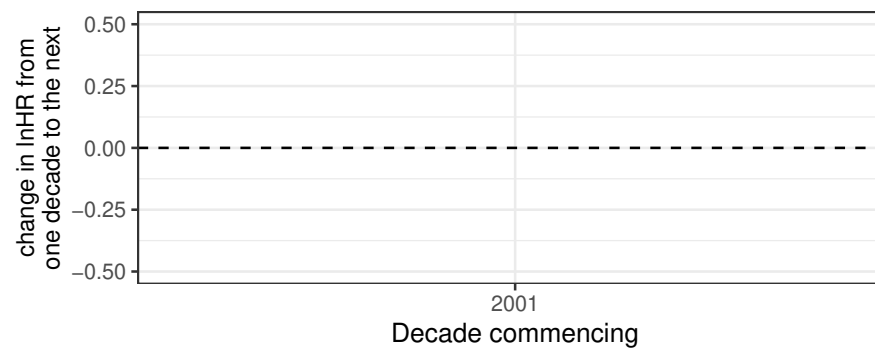

**A** Improvements in five-year mortality following admission

Change in lnHR from one decade to the next (2001–2011)

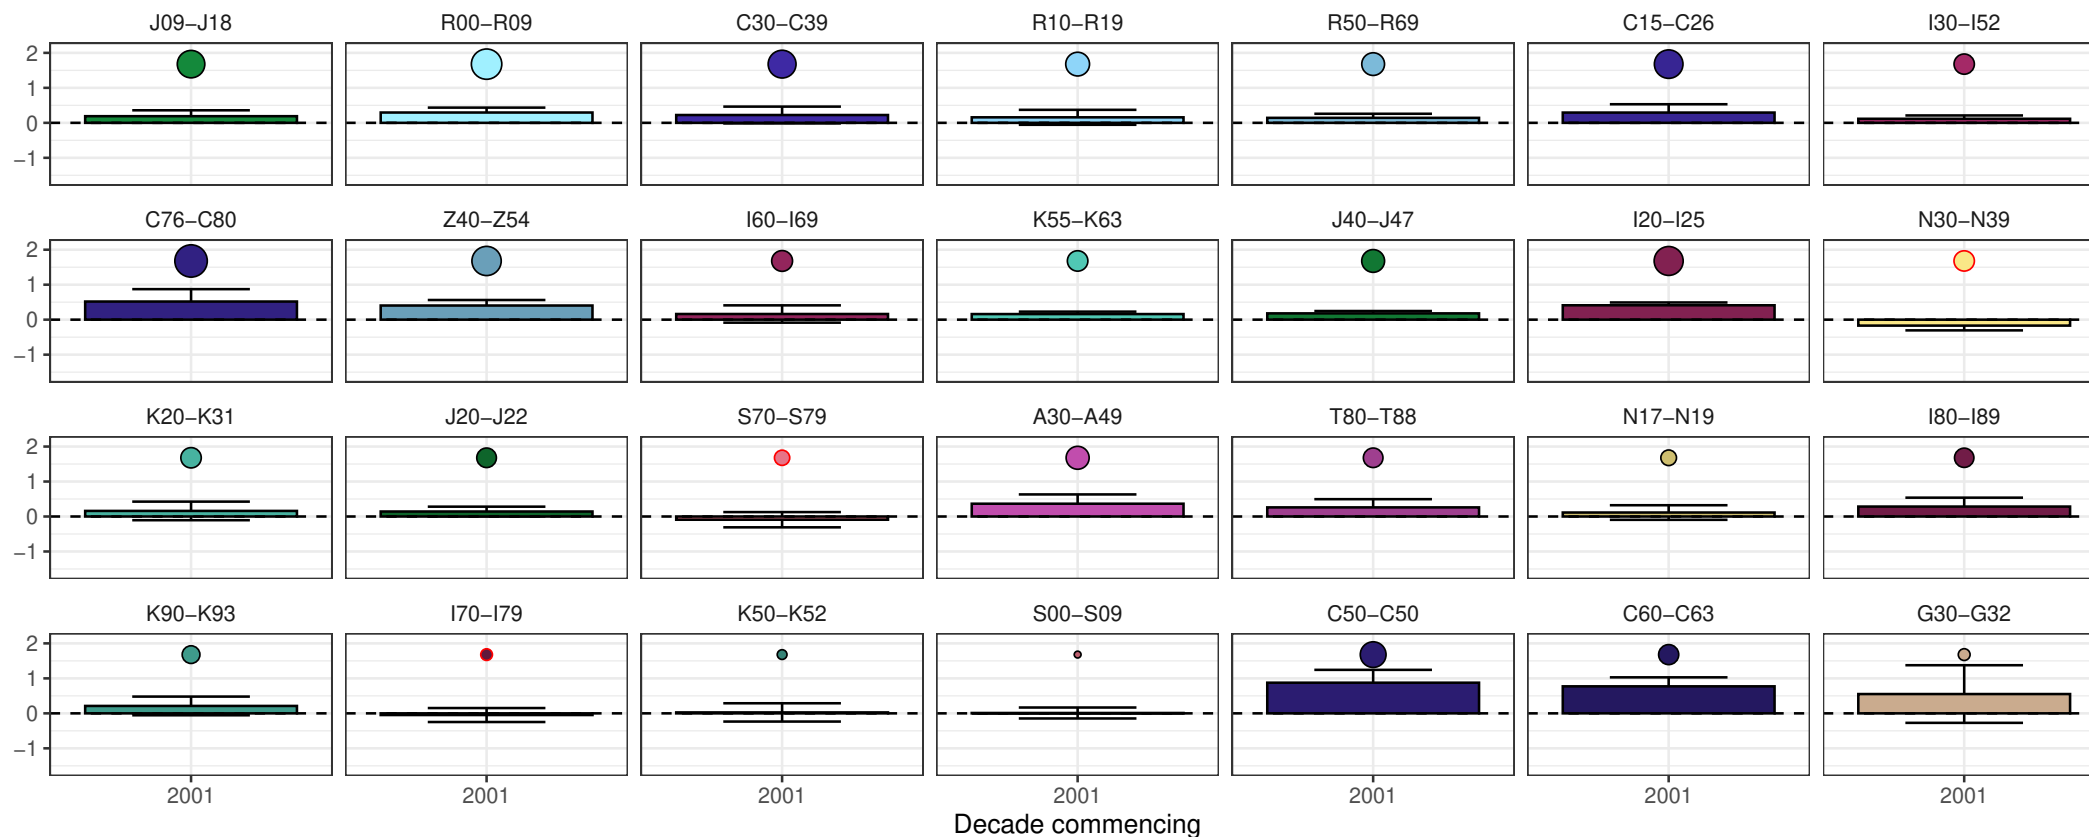

**B** Combined improvements in five-year mortality following admission

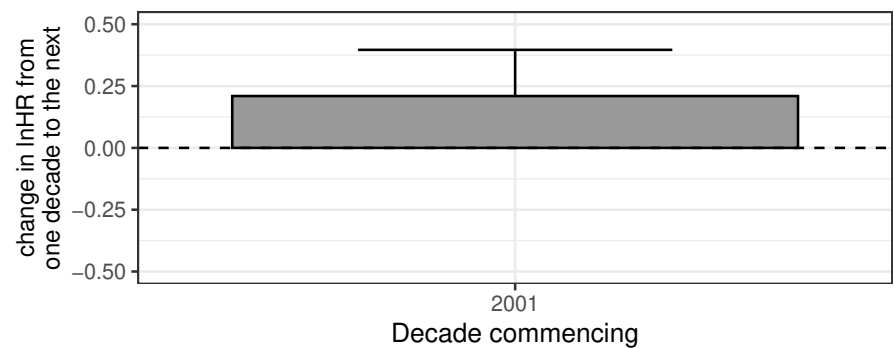

**C** Observed improvements in mortality



**A** Improvements in five-year mortality following admission

Change in lnHR from one decade to the next (2001–2011)

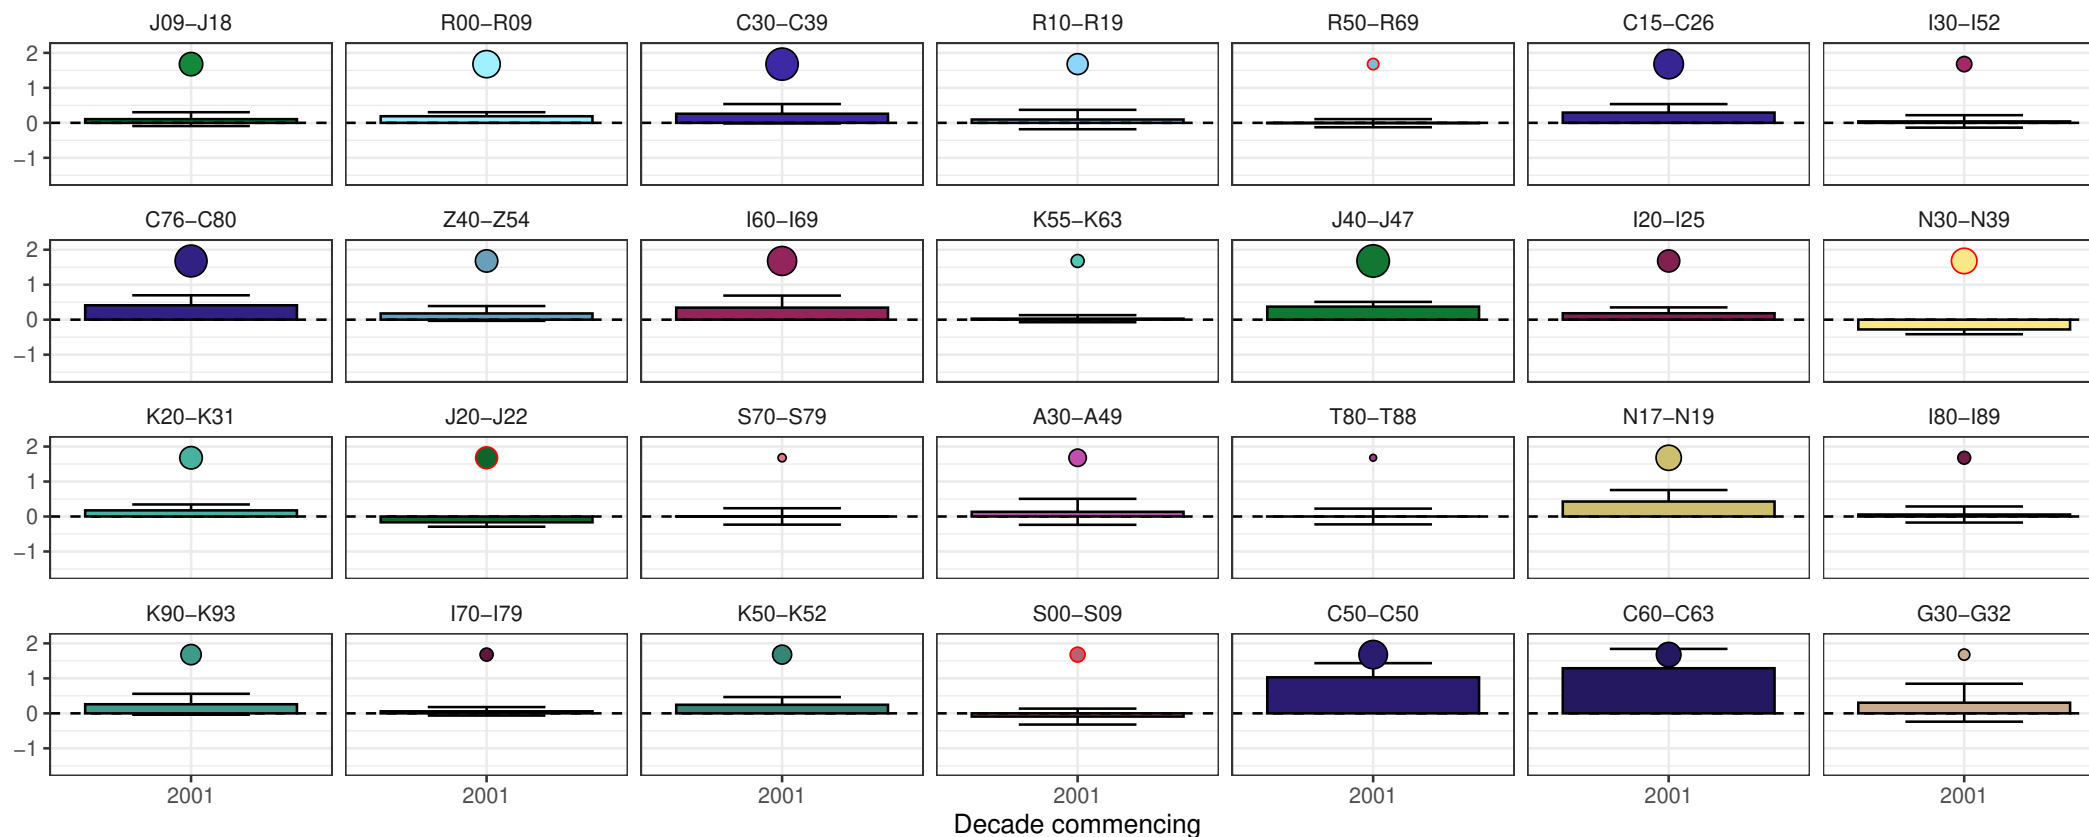

**B** Combined improvements in five-year mortality following admission

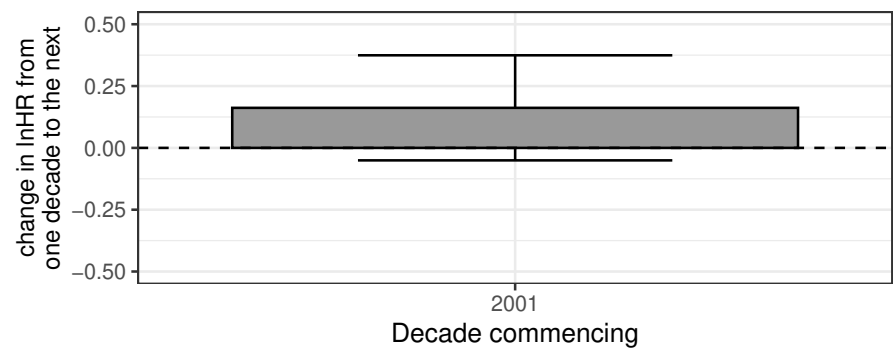

**C**

Observed improvements in mortality



**A** Improvements in five-year mortality following admission

Change in lnHR from one decade to the next (2001–2011)

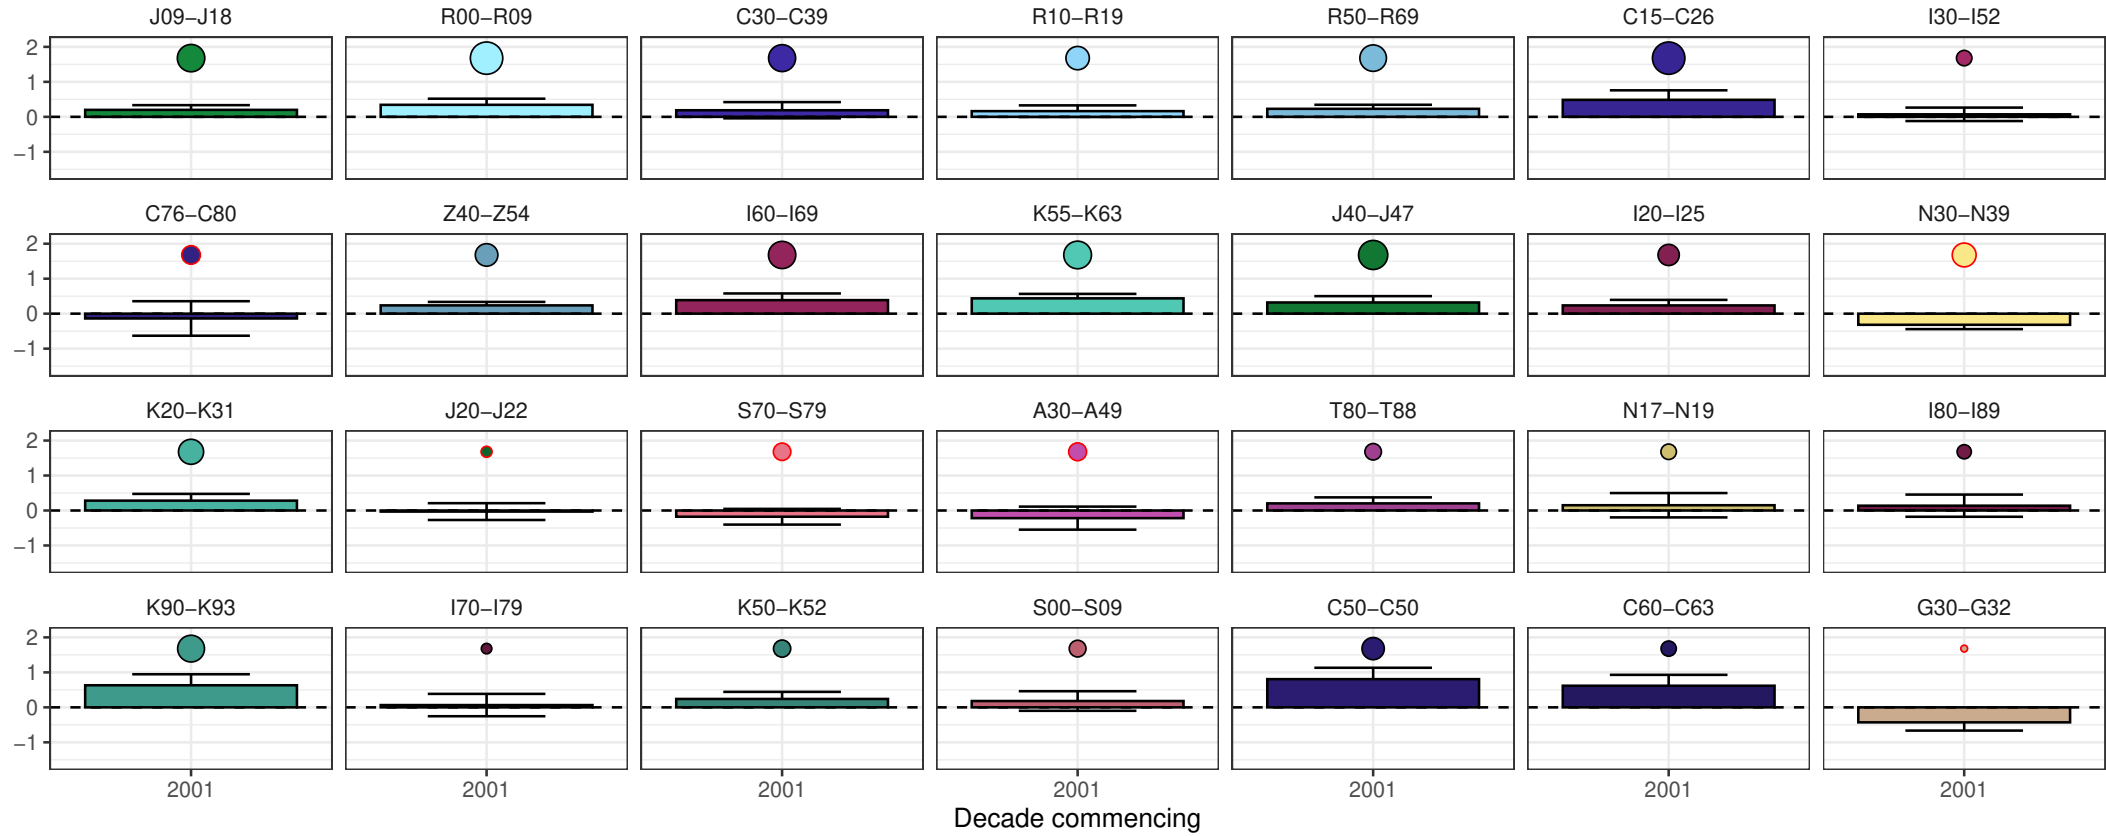

**B** Combined improvements in five-year mortality following admission

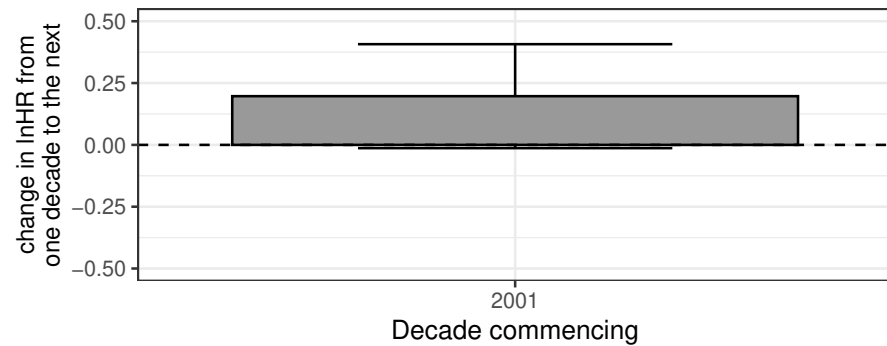

**C** Observed improvements in mortality

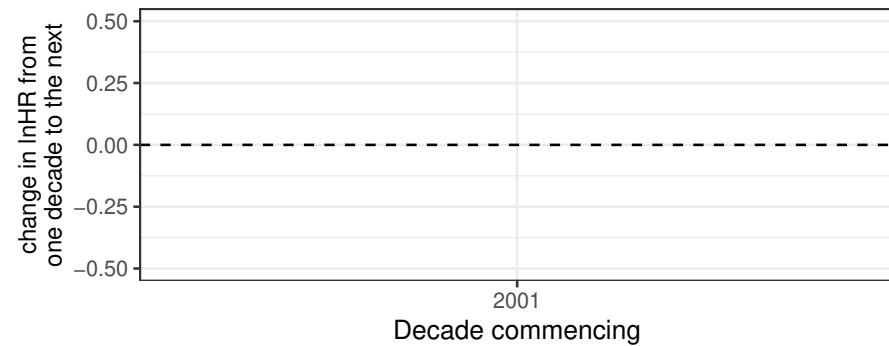

Supplement: inline-supplementary-material-16 [file inline-supplementary-material-16.pdf]
