# Supplementary material
Source: HighWire-hosted journal article supplement (https://bmjopen.bmj.com/content/10/3/e034299)

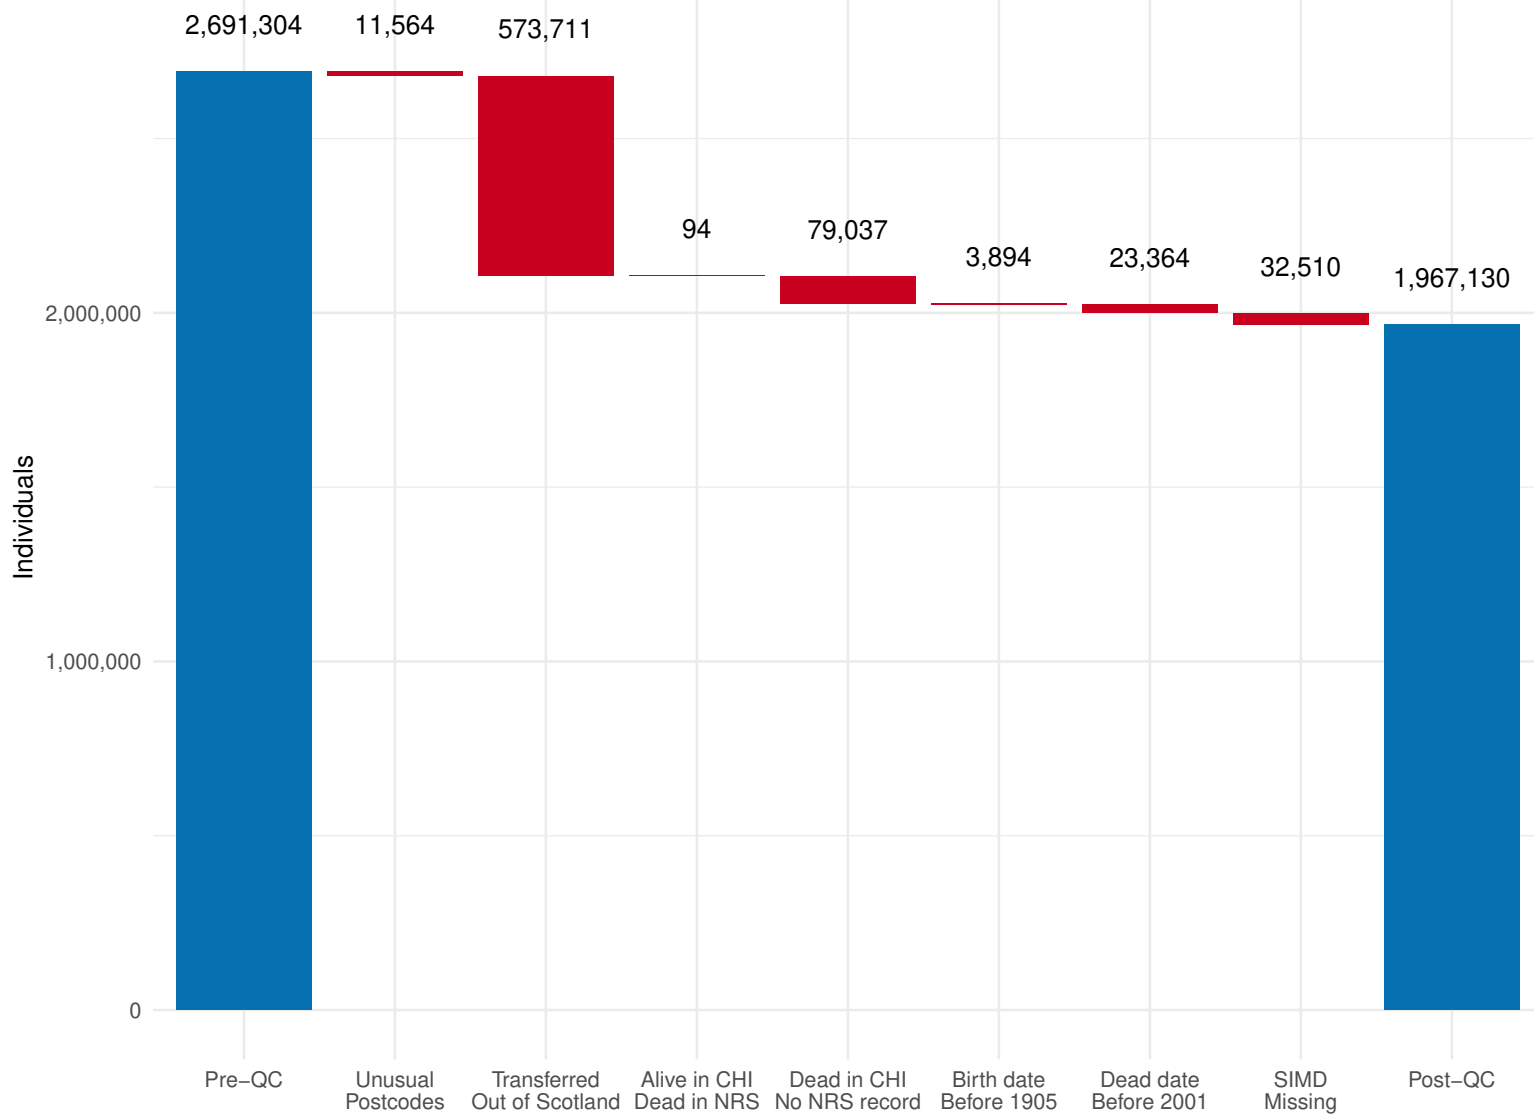

Supplement: inline-supplementary-material-1 [file inline-supplementary-material-1.pdf]
